# Supplementary material for: Rehmannia Glutinosa Extract Activates Endothelial Progenitor Cells in a Rat Model of Myocardial Infarction through a SDF-1 α/CXCR4 Cascade
Source: PLOS journal article supplement (doi:10.1371/journal.pone.0054303), 2013-01-18
Supplement: S1 (10.1371/journal.pone.0054303.s001) [file journal.pone.0054303.s001]

**Supplemental Table S1.** Effect of RGE on endothelial progenitor cell (EPC) number.

| TIME | Control (n=20) | | RGE-L (n=20) | | RGE-M (n=20) | | RGE-H (n=20) | |
| --- | --- | --- | --- | --- | --- | --- | --- | --- |
| (weeks) | blood | bone | blood | bone | blood | bone | blood | bone |
| 0 | 3.08±0.58 |  | 2.73±0.56 |  | 2.84±0.61 |  | 3.40±0.88 |  |
| 4 | 2.79±1.10 | 34.70±1.10 | 3.62±0.62 | 35.24±0.62 | 3.87±0.77 | 33.79±0.77 | 4.15±0.96 | 36.72±0.96 |
| 8 | 2.81±0.71 | 33.57±0.71 | 4.74±1.40 | 40.26±1.40 | 4.92±1.04^ | 39.22±1.04 | 6.04±1.04* | 37.81±2.71^ |
| 12 | 2.44±0.71 | 30.63±0.70 | 5.29±1.22* | 43.27±1.22* | 5.65±1.37* | 44.62±1.37* | 7.24±1.37* | 49.25±1.37* |
| 16 | 2.54±0.82 | 30.09±0.83 | 5.79±1.43* | 42.72±1.43* | 5.74±1.13* | 44.35±1.13* | 7.37±1.23* | 50.96±1.23* |
